# Supplementary material for: T346Hunter: A Novel Web-Based Tool for the Prediction of Type III, Type IV and Type VI Secretion Systems in Bacterial Genomes
Source: PubMed Central journal article supplement (PMC4395097; doi:10.1371/journal.pone.0119317), 2015-04-13
Supplement: pone.0119317.s001.pdf [file pone.0119317.s001.pdf]

# T346Hunter: A novel web-based tool for the prediction of T3SS, T4SS and T6SS

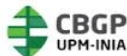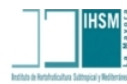

- [Home](#)
- [About](#)
- [User manual](#)
- [Methods](#)
- [Predicted clusters](#)
- [Download profiles](#)
- [Contact us](#)

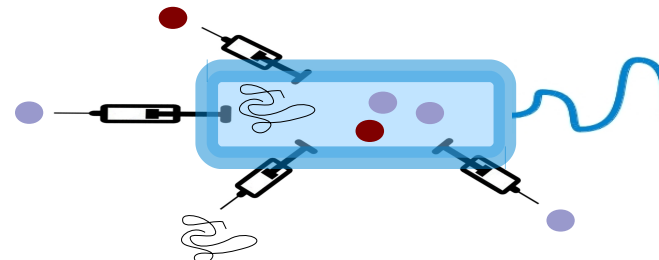

Upload your sequence files for secretion systems prediction

Please leave your email, you will be notified once the job is done.

DNA sequence

E-mail

...or upload NCBI sequence files for a faster execution

Genes Location

Protein sequences

DNA sequence

E-mail

E-value (HMMER) <=  E-value (BLASTp) <=

Sequence shape

Secretion systems to predict  T3SS  T4SS  T6SS

Concatenate sequences

>1

Number of sequences

1

GLIMMER

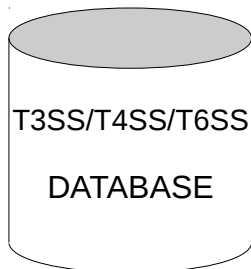

Search secretion systems components (HMMER3/BLASTp)

Tab-delimited output (all hits)

| Gene   | Hit     | SS   | Eval    | ... |
|--------|---------|------|---------|-----|
| id0320 | sctu    | T3SS | 3e-104  | ... |
| id0321 | sctt    | T3SS | 6e-60   | ... |
| id0322 | scts    | T3SS | 8.4e-31 | ... |
| ...    | ...     | ...  | ...     | ... |
| ...    | ...     | ...  | ...     | ... |
| id2144 | vasf    | T6SS | 1.2e-10 | ... |
| id2147 | vca0107 | T6SS | 3.3e-60 | ... |
| ...    | ...     | ...  | ...     | ... |

Identify clusters

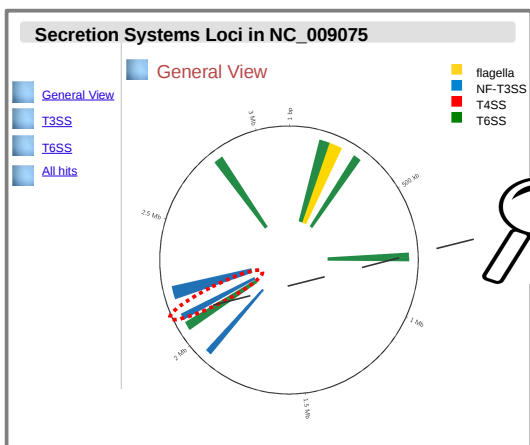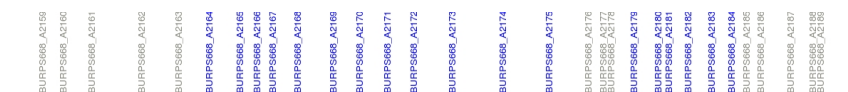

HTML-formatted output (clusters)

5 kb
